# Supplementary material
Source: PubMed Central journal article supplement (PMC3887546)
Supplement: NIHMS527553-supplement-Suppl_Data_1.pdf [file NIHMS527553-supplement-Suppl_Data_1.pdf]

| Sample ID | Sample Set | OtoSCOPE version | Illumina Sequencer | Total Reads | Mapped Reads | Percent Reads Mapped | Percent Reads Overlapping Target | Percent Covered 1X | Percent Covered 10X | Percent Covered 20X | Average Depth of Coverage | Coverage Data Set |
|-----------|------------|------------------|--------------------|-------------|--------------|----------------------|----------------------------------|--------------------|---------------------|---------------------|---------------------------|-------------------|
| 1         | 1          | 1                | GAllx              | 53,810,998  | 52,676,556   | 97.9%                | 27.0%                            | 99.9%              | 99.7%               | 99.6%               | 2,268                     | high coverage     |
| 2         | 1          | 1                | GAllx              | 3,594,022   | 3,461,732    | 96.3%                | 28.0%                            | 99.7%              | 98.8%               | 96.7%               | 191                       | low coverage      |
| 3         | 1          | 1                | GAllx              | 38,894,660  | 37,575,532   | 96.6%                | 12.0%                            | 99.8%              | 99.5%               | 99.3%               | 695                       | high coverage     |
| 4         | 1          | 1                | GAllx              | 39,841,294  | 38,701,254   | 97.1%                | 10.0%                            | 99.8%              | 99.5%               | 99.3%               | 622                       | high coverage     |
| 5         | 1          | 1                | GAllx              | 37,828,576  | 36,878,750   | 97.5%                | 11.0%                            | 99.8%              | 99.5%               | 99.3%               | 638                       | high coverage     |
| 6         | 1          | 1                | GAllx              | 37,791,684  | 34,508,142   | 91.3%                | 11.0%                            | 99.8%              | 99.4%               | 99.0%               | 621                       | high coverage     |
| 7         | 1          | 1                | GAllx              | 66,352,788  | 64,482,970   | 97.2%                | 23.0%                            | 99.9%              | 99.7%               | 99.6%               | 2,385                     | high coverage     |
| 8         | 2          | 2                | GAllx              | 45,976,582  | 18,735,484   | 40.8%                | 26.0%                            | 99.9%              | 99.7%               | 99.5%               | 2,387                     | high coverage     |
| 9         | 2          | 2                | GAllx              | 64,385,502  | 33,977,305   | 52.8%                | 28.0%                            | 99.9%              | 99.7%               | 99.6%               | 3,518                     | high coverage     |
| 10        | 2          | 2                | GAllx              | 50,207,028  | 26,231,536   | 52.3%                | 29.0%                            | 99.9%              | 99.7%               | 99.5%               | 2,906                     | high coverage     |
| 11        | 2          | 2                | GAllx              | 48,569,562  | 26,617,458   | 54.8%                | 29.0%                            | 99.9%              | 99.7%               | 99.6%               | 2,797                     | high coverage     |
| 12        | 2          | 2                | GAllx              | 41,037,728  | 20,428,397   | 49.8%                | 18.0%                            | 99.9%              | 99.6%               | 99.5%               | 1,423                     | high coverage     |
| 13        | 2          | 2                | GAllx              | 47,178,404  | 21,839,900   | 46.3%                | 26.0%                            | 99.9%              | 99.6%               | 99.5%               | 2,466                     | high coverage     |
| 14        | 2          | 2                | GAllx              | 68,215,072  | 41,000,201   | 60.1%                | 38.0%                            | 99.9%              | 99.7%               | 99.7%               | 5,118                     | high coverage     |
| 15        | 3          | 3                | HiSeq              | 21,042,538  | 19,942,163   | 94.8%                | 58.0%                            | 97.9%              | 96.4%               | 95.7%               | 2,145                     | high coverage     |
| 16        | 3          | 3                | HiSeq              | 26,067,210  | 24,899,119   | 95.5%                | 58.0%                            | 97.8%              | 96.5%               | 96.0%               | 2,627                     | high coverage     |
| 17        | 3          | 3                | HiSeq              | 28,595,682  | 27,324,103   | 95.6%                | 56.0%                            | 98.2%              | 96.8%               | 96.1%               | 2,824                     | high coverage     |
| 18        | 3          | 3                | HiSeq              | 25,887,818  | 24,703,450   | 95.4%                | 57.0%                            | 98.1%              | 96.5%               | 95.8%               | 2,380                     | high coverage     |
| 19        | 3          | 3                | HiSeq              | 20,230,240  | 17,604,736   | 87.0%                | 63.0%                            | 98.4%              | 97.5%               | 97.1%               | 3,246                     | high coverage     |
| 20        | 3          | 3                | HiSeq              | 31,214,202  | 25,597,024   | 82.0%                | 60.0%                            | 98.5%              | 97.7%               | 97.2%               | 1,852                     | high coverage     |
| 21        | 3          | 3                | HiSeq              | 20,060,504  | 16,729,068   | 83.4%                | 63.0%                            | 98.5%              | 97.8%               | 97.2%               | 2,975                     | high coverage     |
| 22        | 3          | 3                | HiSeq              | 27,951,056  | 24,391,327   | 87.3%                | 64.0%                            | 98.5%              | 97.8%               | 97.5%               | 2,808                     | high coverage     |
| 23        | 3          | 3                | HiSeq              | 26,390,926  | 23,174,107   | 87.8%                | 66.0%                            | 98.5%              | 97.8%               | 97.3%               | 1,664                     | high coverage     |
| 24        | 3          | 3                | HiSeq              | 14,512,612  | 12,668,932   | 87.3%                | 65.0%                            | 98.6%              | 97.5%               | 96.9%               | 2,166                     | high coverage     |
| 25        | 3          | 3                | HiSeq              | 32,489,292  | 31,930,627   | 98.3%                | 52.0%                            | 99.8%              | 99.3%               | 99.2%               | 3,661                     | high coverage     |
| 26        | 3          | 3                | HiSeq              | 17,863,414  | 17,537,868   | 98.2%                | 52.0%                            | 99.8%              | 99.4%               | 99.2%               | 2,020                     | high coverage     |
| 27        | 3          | 3                | HiSeq              | 31,943,868  | 31,297,909   | 98.0%                | 51.0%                            | 99.9%              | 99.5%               | 99.3%               | 3,542                     | low coverage      |
| 28        | 3          | 3                | HiSeq              | 23,788,022  | 23,247,290   | 97.7%                | 51.0%                            | 99.8%              | 99.5%               | 99.3%               | 2,613                     | high coverage     |
| 29        | 3          | 3                | HiSeq              | 25,154,254  | 24,646,920   | 98.0%                | 52.0%                            | 99.9%              | 99.5%               | 99.3%               | 2,826                     | high coverage     |
| 30        | 3          | 3                | HiSeq              | 35,746,792  | 35,065,213   | 98.1%                | 52.0%                            | 99.9%              | 99.6%               | 99.4%               | 4,011                     | high coverage     |
| 31        | 3          | 3                | HiSeq              | 21,104,258  | 20,700,753   | 98.1%                | 47.0%                            | 99.9%              | 99.4%               | 99.3%               | 2,142                     | high coverage     |
| 32        | 3          | 3                | HiSeq              | 25,072,660  | 24,589,300   | 98.1%                | 52.0%                            | 99.9%              | 99.5%               | 99.3%               | 2,800                     | high coverage     |
| 33        | 3          | 3                | HiSeq              | 9,867,026   | 9,664,244    | 97.9%                | 51.0%                            | 99.8%              | 99.3%               | 99.0%               | 1,094                     | high coverage     |
| 34        | 3          | 4                | HiSeq              | 63,482,934  | 55,760,429   | 87.8%                | 49.0%                            | 98.6%              | 98.1%               | 98.0%               | 5,417                     | high coverage     |
| 35        | 4          | 4                | HiSeq              | 2,264,696   | 2,205,625    | 97.4%                | 64.0%                            | 99.4%              | 97.3%               | 93.3%               | 216                       | low coverage      |
| 36        | 4          | 4                | HiSeq              | 2,693,716   | 2,611,594    | 97.0%                | 65.0%                            | 99.5%              | 98.1%               | 95.6%               | 249                       | low coverage      |
| 37        | 4          | 4                | HiSeq              | 2,868,676   | 2,796,878    | 97.5%                | 67.0%                            | 99.5%              | 97.7%               | 94.8%               | 276                       | low coverage      |
| 38        | 4          | 4                | HiSeq              | 1,282,442   | 1,246,334    | 97.2%                | 67.0%                            | 99.3%              | 94.1%               | 85.6%               | 126                       | low coverage      |
| 39        | 4          | 4                | HiSeq              | 1,450,350   | 1,405,513    | 96.9%                | 65.0%                            | 99.3%              | 94.5%               | 87.2%               | 139                       | low coverage      |
| 40        | 4          | 4                | HiSeq              | 2,353,504   | 2,288,145    | 97.2%                | 66.0%                            | 99.5%              | 96.9%               | 92.3%               | 222                       | low coverage      |
| 41        | 4          | 4                | HiSeq              | 3,139,220   | 2,997,962    | 95.5%                | 53.0%                            | 99.5%              | 98.2%               | 96.2%               | 243                       | low coverage      |
| 42        | 4          | 4                | HiSeq              | 2,970,202   | 2,887,453    | 97.2%                | 67.0%                            | 99.5%              | 97.8%               | 95.2%               | 286                       | low coverage      |
| 43        | 4          | 4                | HiSeq              | 2,972,024   | 2,886,908    | 97.1%                | 66.0%                            | 99.5%              | 97.8%               | 95.2%               | 289                       | low coverage      |

|    |   |         |            |            |       |       |       |       |       |       |               |
|----|---|---------|------------|------------|-------|-------|-------|-------|-------|-------|---------------|
| 44 | 4 | 4 HiSeq | 2,266,478  | 2,205,114  | 97.3% | 64.0% | 99.5% | 97.3% | 92.9% | 218   | low coverage  |
| 45 | 4 | 4 HiSeq | 2,886,892  | 2,804,904  | 97.2% | 66.0% | 99.5% | 97.9% | 95.1% | 281   | low coverage  |
| 46 | 4 | 4 HiSeq | 2,537,160  | 2,466,686  | 97.2% | 68.0% | 99.5% | 97.6% | 94.1% | 247   | low coverage  |
| 47 | 4 | 4 HiSeq | 1,777,164  | 1,710,110  | 96.2% | 45.0% | 99.2% | 93.7% | 84.9% | 120   | low coverage  |
| 48 | 4 | 4 HiSeq | 2,789,352  | 2,713,371  | 97.3% | 68.0% | 99.5% | 97.8% | 94.6% | 270   | low coverage  |
| 49 | 4 | 4 HiSeq | 2,455,174  | 2,387,199  | 97.2% | 63.0% | 99.5% | 97.6% | 94.1% | 231   | low coverage  |
| 50 | 4 | 4 HiSeq | 2,308,206  | 2,239,757  | 97.0% | 63.0% | 99.5% | 97.6% | 93.9% | 211   | low coverage  |
| 51 | 4 | 4 HiSeq | 2,434,906  | 2,367,544  | 97.2% | 65.0% | 99.5% | 97.1% | 93.3% | 237   | low coverage  |
| 52 | 4 | 4 HiSeq | 1,905,942  | 1,855,767  | 97.4% | 66.0% | 99.4% | 96.4% | 91.0% | 186   | low coverage  |
| 53 | 4 | 4 HiSeq | 2,125,506  | 2,065,935  | 97.2% | 67.0% | 99.4% | 97.0% | 92.6% | 206   | low coverage  |
| 54 | 4 | 4 HiSeq | 2,616,644  | 2,545,453  | 97.3% | 67.0% | 99.5% | 97.5% | 94.1% | 251   | low coverage  |
| 55 | 4 | 4 HiSeq | 2,565,092  | 2,492,928  | 97.2% | 65.0% | 99.5% | 97.4% | 93.7% | 247   | low coverage  |
| 56 | 4 | 4 HiSeq | 3,558,030  | 3,421,617  | 96.2% | 47.0% | 99.5% | 97.4% | 94.1% | 247   | low coverage  |
| 57 | 4 | 4 HiSeq | 2,546,110  | 2,476,962  | 97.3% | 66.0% | 99.5% | 97.7% | 94.4% | 248   | low coverage  |
| 58 | 4 | 4 HiSeq | 2,375,448  | 2,302,624  | 96.9% | 62.0% | 99.5% | 97.5% | 94.1% | 213   | low coverage  |
| 59 | 4 | 4 HiSeq | 2,921,094  | 2,839,098  | 97.2% | 65.0% | 99.5% | 97.7% | 94.7% | 285   | low coverage  |
| 60 | 4 | 4 HiSeq | 3,221,080  | 3,133,426  | 97.3% | 66.0% | 99.4% | 97.8% | 95.2% | 314   | low coverage  |
| 61 | 4 | 4 HiSeq | 4,909,916  | 4,778,550  | 97.3% | 66.0% | 99.6% | 98.6% | 97.3% | 486   | high coverage |
| 62 | 4 | 4 HiSeq | 3,290,058  | 3,168,259  | 96.3% | 49.0% | 99.5% | 97.4% | 93.8% | 239   | low coverage  |
| 63 | 4 | 4 HiSeq | 2,513,946  | 2,450,905  | 97.5% | 64.0% | 99.5% | 97.5% | 93.5% | 241   | low coverage  |
| 64 | 4 | 4 HiSeq | 3,084,724  | 2,995,825  | 97.1% | 64.0% | 99.6% | 98.2% | 95.8% | 286   | low coverage  |
| 65 | 4 | 4 HiSeq | 2,784,804  | 2,704,425  | 97.1% | 63.0% | 99.5% | 97.6% | 94.5% | 261   | low coverage  |
| 66 | 4 | 4 HiSeq | 2,880,608  | 2,803,639  | 97.3% | 63.0% | 99.5% | 97.7% | 94.7% | 276   | low coverage  |
| 67 | 4 | 4 HiSeq | 3,098,088  | 2,983,583  | 96.3% | 49.0% | 99.5% | 97.3% | 93.6% | 228   | low coverage  |
| 68 | 4 | 4 HiSeq | 2,870,264  | 2,798,897  | 97.5% | 63.0% | 99.5% | 97.4% | 93.8% | 284   | low coverage  |
| 69 | 4 | 4 HiSeq | 2,855,824  | 2,782,906  | 97.5% | 64.0% | 99.5% | 97.7% | 94.5% | 276   | low coverage  |
| 70 | 4 | 4 HiSeq | 4,818,962  | 4,625,947  | 96.0% | 43.0% | 99.5% | 98.0% | 95.7% | 309   | low coverage  |
| 71 | 4 | 4 HiSeq | 2,432,702  | 2,354,675  | 96.8% | 61.0% | 99.5% | 98.3% | 96.0% | 213   | low coverage  |
| 72 | 4 | 4 HiSeq | 3,011,352  | 2,935,690  | 97.5% | 63.0% | 99.5% | 97.8% | 94.8% | 288   | low coverage  |
| 73 | 4 | 4 HiSeq | 2,245,106  | 2,180,356  | 97.1% | 63.0% | 98.8% | 96.2% | 92.1% | 213   | low coverage  |
| 74 | 5 | 4 HiSeq | 9,583,798  | 9,472,690  | 98.9% | 63.0% | 99.7% | 99.2% | 98.8% | 1,060 | high coverage |
| 75 | 5 | 4 HiSeq | 38,431,418 | 37,933,375 | 98.7% | 61.0% | 99.8% | 99.6% | 99.5% | 4,069 | high coverage |
| 76 | 5 | 4 HiSeq | 28,334,156 | 27,936,722 | 98.6% | 62.0% | 99.8% | 99.5% | 99.4% | 3,061 | high coverage |
| 77 | 5 | 4 HiSeq | 33,800,574 | 33,300,737 | 98.5% | 57.0% | 99.8% | 99.5% | 99.4% | 3,382 | high coverage |
| 78 | 5 | 4 HiSeq | 13,635,284 | 13,448,333 | 98.2% | 60.0% | 99.8% | 99.4% | 99.2% | 1,426 | high coverage |
| 79 | 5 | 4 HiSeq | 24,878,948 | 24,557,004 | 98.8% | 61.0% | 99.8% | 99.4% | 99.3% | 2,637 | high coverage |
| 80 | 5 | 4 HiSeq | 18,389,084 | 18,179,409 | 98.6% | 62.0% | 99.8% | 99.5% | 99.3% | 1,972 | high coverage |
| 81 | 5 | 4 HiSeq | 35,953,736 | 35,567,420 | 98.7% | 63.0% | 99.8% | 99.6% | 99.5% | 3,937 | high coverage |
| 82 | 5 | 4 HiSeq | 37,244,804 | 36,817,861 | 98.9% | 63.0% | 99.8% | 99.6% | 99.5% | 4,107 | high coverage |
| 83 | 5 | 4 HiSeq | 29,756,970 | 29,412,611 | 98.8% | 62.0% | 99.8% | 99.5% | 99.4% | 3,185 | high coverage |
| 84 | 5 | 4 HiSeq | 36,342,244 | 35,938,076 | 98.9% | 62.0% | 99.8% | 99.6% | 99.5% | 3,942 | high coverage |
| 85 | 5 | 4 MiSeq | 30,429,900 | 29,868,313 | 98.2% | 59.0% | 99.7% | 99.4% | 99.3% | 3,157 | high coverage |
| 86 | 5 | 4 MiSeq | 36,004,716 | 35,126,124 | 97.6% | 53.0% | 99.8% | 99.5% | 99.4% | 3,341 | high coverage |
| 87 | 5 | 4 MiSeq | 32,706,904 | 32,107,580 | 98.2% | 65.0% | 99.8% | 99.6% | 99.4% | 3,738 | high coverage |
| 88 | 5 | 4 MiSeq | 45,361,948 | 43,125,199 | 95.1% | 31.0% | 99.7% | 99.4% | 99.3% | 2,524 | high coverage |
| 89 | 6 | 4 MiSeq | 1,649,044  | 1,209,012  | 73.3% | 46.0% | 99.2% | 95.8% | 89.4% | 194   | low coverage  |

|     |   |         |           |           |       |       |       |       |       |                  |
|-----|---|---------|-----------|-----------|-------|-------|-------|-------|-------|------------------|
| 90  | 6 | 4 MiSeq | 2,993,118 | 1,944,308 | 65.0% | 43.0% | 99.4% | 97.5% | 94.5% | 327 low coverage |
| 91  | 6 | 4 MiSeq | 2,027,212 | 1,379,173 | 68.0% | 43.0% | 99.3% | 95.8% | 90.1% | 225 low coverage |
| 92  | 6 | 4 MiSeq | 1,650,248 | 1,228,750 | 74.5% | 43.0% | 99.4% | 96.0% | 90.0% | 181 low coverage |
| 93  | 6 | 4 MiSeq | 2,760,320 | 2,026,516 | 73.4% | 46.0% | 99.5% | 98.0% | 95.5% | 325 low coverage |
| 94  | 6 | 4 MiSeq | 965,496   | 862,123   | 89.3% | 45.0% | 99.5% | 94.5% | 85.6% | 107 low coverage |
| 95  | 6 | 4 MiSeq | 1,183,196 | 992,030   | 83.8% | 37.0% | 99.3% | 93.6% | 84.3% | 110 low coverage |
| 96  | 6 | 4 MiSeq | 1,000,578 | 868,093   | 86.8% | 54.0% | 99.4% | 95.3% | 88.4% | 137 low coverage |
| 97  | 6 | 4 MiSeq | 1,038,790 | 823,618   | 79.3% | 32.0% | 99.0% | 90.8% | 78.7% | 83 low coverage  |
| 98  | 6 | 4 MiSeq | 966,810   | 792,360   | 82.0% | 41.0% | 98.8% | 90.5% | 80.0% | 101 low coverage |
| 99  | 6 | 4 MiSeq | 690,352   | 452,753   | 65.6% | 34.0% | 98.9% | 86.0% | 71.7% | 62 low coverage  |
| 100 | 6 | 4 MiSeq | 799,110   | 498,063   | 62.3% | 32.0% | 98.8% | 86.1% | 72.6% | 68 low coverage  |
