# Supplementary material
Source: PubMed Central journal article supplement (PMC3887546)
Supplement: NIHMS527553-supplement-Suppl_Data_2.pdf [file NIHMS527553-supplement-Suppl_Data_2.pdf]

| Sample ID | Inheritance Type   | Sex    | Age | Hearing Loss Onset | Type of Hearing Loss | Previous Genetic Testing  | Solved     | Novel Causative Mutation? | n Total Variants | n High Quality Variants | n NS/SS/I Variants | n Rare NS/SS/I Variants | n Candidate Variants | n Reported DCMs | n Other Disease-Causing Mutations |
|-----------|--------------------|--------|-----|--------------------|----------------------|---------------------------|------------|---------------------------|------------------|-------------------------|--------------------|-------------------------|----------------------|-----------------|-----------------------------------|
| 1         | presumed recessive | female | 6   | congenital         | severe-profound      | DFNB1 testing             | solved     | reported mutation         | 481              | 452                     | 65                 | 4                       | 3                    | 1               | 0                                 |
| 2         | dominant           | female | 51  | childhood (<18)    | severe-profound      | DFNB1 testing             | not solved | -                         | 456              | 409                     | 65                 | 5                       | 3                    | 0               | 0                                 |
| 3         | presumed recessive | male   | 14  | childhood (<18)    | mild-moderate        | DFNB1 testing             | solved     | novel mutation            | 519              | 478                     | 66                 | 4                       | 2                    | 1               | 0                                 |
| 4         | presumed recessive | female | 6   | childhood (<18)    | mild-moderate        | DFNB1 testing             | solved     | novel mutation            | 450              | 408                     | 54                 | 4                       | 1                    | 0               | 0                                 |
| 5         | dominant           | female | 26  | childhood (<18)    | mild-moderate        | no testing                | not solved | -                         | 447              | 406                     | 66                 | 4                       | 1                    | 0               | 0                                 |
| 6         | dominant           | male   | 58  | childhood (<18)    | mild-moderate        | no testing                | solved     | reported mutation         | 461              | 423                     | 62                 | 4                       | 1                    | 1               | 1                                 |
| 7         | presumed recessive | female | 58  | childhood (<18)    | severe-profound      | no testing                | solved     | novel mutation            | 512              | 463                     | 57                 | 4                       | 3                    | 0               | 0                                 |
| 8         | presumed recessive | female | 15  | congenital         | mild-moderate        | no testing                | solved     | novel mutation            | 557              | 502                     | 71                 | 4                       | 3                    | 0               | 0                                 |
| 9         | dominant           | female | 70  | childhood (<18)    | mild-moderate        | other gene test           | not solved | -                         | 504              | 457                     | 74                 | 3                       | 2                    | 0               | 0                                 |
| 10        | dominant           | male   | 55  | childhood (<18)    | mild-moderate        | no testing                | solved     | novel mutation            | 472              | 424                     | 62                 | 1                       | 1                    | 1               | 1                                 |
| 11        | dominant           | male   | 69  | adult onset (>18)  | mild-moderate        | no testing                | not solved | -                         | 576              | 518                     | 79                 | 2                       | 1                    | 0               | 0                                 |
| 12        | presumed recessive | male   | 5   | childhood (<18)    | severe-profound      | DFNB1 testing             | not solved | -                         | 537              | 498                     | 68                 | 3                       | 2                    | 0               | 0                                 |
| 13        | presumed recessive | male   | 17  | childhood (<18)    | severe-profound      | no testing                | not solved | -                         | 497              | 456                     | 69                 | 3                       | 0                    | 0               | 0                                 |
| 14        | presumed recessive | female | 56  | adult onset (>18)  | severe-profound      | other gene test           | not solved | -                         | 454              | 410                     | 54                 | 4                       | 3                    | 0               | 0                                 |
| 15        | presumed recessive | male   | 68  | 0                  | mild-moderate        | no testing                | solved     | reported mutation         | 408              | 369                     | 70                 | 3                       | 1                    | 1               | 0                                 |
| 16        | presumed recessive | male   | 7   | childhood (<18)    | severe-profound      | DFNB1 testing             | not solved | -                         | 407              | 376                     | 77                 | 7                       | 6                    | 2               | 0                                 |
| 17        | sporadic           | male   | 4   | congenital         | severe-profound      | no testing                | not solved | -                         | 393              | 359                     | 81                 | 7                       | 6                    | 1               | 1                                 |
| 18        | sporadic           | male   | 2   | congenital         | severe-profound      | DFNB1 and other gene test | solved     | novel mutation            | 392              | 353                     | 76                 | 10                      | 9                    | 0               | 0                                 |
| 19        | presumed recessive | female | 12  | congenital         | severe-profound      | DFNB1 testing             | solved     | reported mutation         | 366              | 343                     | 72                 | 7                       | 5                    | 1               | 0                                 |
| 20        | presumed recessive | female | 9   | congenital         | severe-profound      | DFNB1 testing             | not solved | -                         | 396              | 367                     | 82                 | 4                       | 2                    | 0               | 0                                 |
| 21        | sporadic           | male   | 4   | childhood (<18)    | asymmetric           | DFNB1 and other gene test | not solved | -                         | 466              | 412                     | 72                 | 4                       | 2                    | 1               | 1                                 |
| 22        | sporadic           | female | 4   | congenital         | severe-profound      | DFNB1 testing             | solved     | novel mutation            | 403              | 378                     | 65                 | 4                       | 3                    | 0               | 0                                 |
| 23        | dominant           | male   | 5   | congenital         | severe-profound      | no testing                | solved     | novel mutation            | 378              | 350                     | 62                 | 2                       | 1                    | 0               | 1                                 |
| 24        | dominant           | -      | -   | -                  | -                    | no testing                | not solved | -                         | 345              | 317                     | 67                 | 1                       | 0                    | 0               | 0                                 |
| 25        | presumed recessive | female | 6   | childhood (<18)    | mild-moderate        | DFNB1 testing             | solved     | reported mutation         | 357              | 333                     | 59                 | 7                       | 5                    | 1               | 1                                 |
| 26        | sporadic           | female | 1   | congenital         | mild-moderate        | no testing                | solved     | novel mutation            | 459              | 436                     | 85                 | 19                      | 17                   | 1               | 0                                 |
| 27        | dominant           | male   | 8   | childhood (<18)    | mild-moderate        | other gene test           | solved     | reported mutation         | 399              | 371                     | 71                 | 1                       | 1                    | 1               | 0                                 |
| 28        | sporadic           | male   | 31  | childhood (<18)    | mild-moderate        | no testing                | not solved | -                         | 419              | 391                     | 80                 | 4                       | 3                    | 0               | 1                                 |
| 29        | presumed recessive | male   | 50  | childhood (<18)    | severe-profound      | no testing                | solved     | novel mutation            | 378              | 353                     | 69                 | 8                       | 7                    | 2               | 0                                 |
| 30        | dominant           | female | 10  | congenital         | mild-moderate        | other gene test           | not solved | -                         | 367              | 340                     | 61                 | 2                       | 1                    | 0               | 0                                 |
| 31        | dominant           | female | 0   | congenital         | severe-profound      | no testing                | not solved | -                         | 384              | 354                     | 74                 | 2                       | 1                    | 0               | 0                                 |
| 32        | dominant           | female | 47  | adult onset (>18)  | mild-moderate        | no testing                | not solved | -                         | 431              | 393                     | 81                 | 3                       | 1                    | 2               | 1                                 |
| 33        | sporadic           | male   | 6   | childhood (<18)    | severe-profound      | no testing                | not solved | -                         | 427              | 404                     | 84                 | 9                       | 6                    | 0               | 0                                 |
| 34        | sporadic           | female | 45  | congenital         | severe-profound      | no testing                | solved     | reported mutation         | 543              | 481                     | 72                 | 5                       | 3                    | 1               | 0                                 |
| 35        | presumed recessive | female | 0   | congenital         | severe-profound      | no testing                | solved     | reported mutation         | 571              | 468                     | 76                 | 11                      | 5                    | 1               | 0                                 |
| 36        | dominant           | female | 54  | adult onset (>18)  | mild-moderate        | no testing                | not solved | -                         | 539              | 426                     | 61                 | 5                       | 0                    | 0               | 0                                 |
| 37        | sporadic           | female | 8   | congenital         | severe-profound      | no testing                | not solved | -                         | 610              | 492                     | 74                 | 7                       | 3                    | 0               | 0                                 |
| 38        | presumed recessive | male   | 0   | congenital         | severe-profound      | no testing                | not solved | -                         | 553              | 463                     | 64                 | 7                       | 3                    | 0               | 0                                 |
| 39        | presumed recessive | male   | 5   | congenital         | severe-profound      | no testing                | solved     | novel mutation            | 548              | 452                     | 68                 | 7                       | 3                    | 0               | 0                                 |
| 40        | dominant           | female | 65  | adult onset (>18)  | mild-moderate        | no testing                | solved     | novel mutation            | 602              | 481                     | 74                 | 6                       | 2                    | 1               | 0                                 |
| 41        | presumed recessive | male   | 6   | congenital         | mild-moderate        | DFNB1 and other gene test | solved     | reported mutation         | 673              | 566                     | 90                 | 7                       | 3                    | 1               | 0                                 |
| 42        | dominant           | male   | 8   | childhood (<18)    | severe-profound      | no testing                | solved     | novel mutation            | 553              | 499                     | 66                 | 8                       | 3                    | 2               | 1                                 |
| 43        | presumed recessive | male   | 0   | congenital         | severe-profound      | no testing                | solved     | novel mutation            | 593              | 487                     | 66                 | 5                       | 2                    | 0               | 0                                 |
| 44        | presumed recessive | male   | 0   | congenital         | severe-profound      | no testing                | solved     | reported mutation         | 585              | 486                     | 72                 | 11                      | 5                    | 0               | 0                                 |
| 45        | presumed recessive | female | 0   | congenital         | severe-profound      | no testing                | not solved | -                         | 579              | 471                     | 75                 | 8                       | 3                    | 0               | 0                                 |

|    |                    |        |    |                   |                 |                           |            |                   |     |     |    |    |   |   |   |
|----|--------------------|--------|----|-------------------|-----------------|---------------------------|------------|-------------------|-----|-----|----|----|---|---|---|
| 46 | sporadic           | female | 41 | congenital        | severe-profound | DFNB1 testing             | not solved | -                 | 568 | 450 | 70 | 6  | 1 | 0 | 0 |
| 47 | presumed recessive | female | 4  | congenital        | severe-profound | no testing                | not solved | -                 | 792 | 416 | 62 | 10 | 4 | 1 | 0 |
| 48 | sporadic           | female | 65 | adult onset (>18) | mild-moderate   | no testing                | not solved | -                 | 643 | 520 | 70 | 6  | 2 | 1 | 1 |
| 49 | presumed recessive | female | 1  | congenital        | asymmetric      | no testing                | not solved | -                 | 559 | 453 | 74 | 8  | 3 | 0 | 1 |
| 50 | dominant           | male   | 43 | congenital        | severe-profound | no testing                | not solved | -                 | 551 | 446 | 74 | 5  | 2 | 0 | 0 |
| 51 | presumed recessive | male   | 4  | congenital        | severe-profound | DFNB1 testing             | solved     | novel mutation    | 615 | 514 | 84 | 11 | 7 | 1 | 1 |
| 52 | sporadic           | female | 4  | congenital        | asymmetric      | DFNB1 testing             | not solved | -                 | 580 | 473 | 65 | 7  | 1 | 0 | 0 |
| 53 | sporadic           | male   | 15 | congenital        | asymmetric      | no testing                | not solved | -                 | 568 | 468 | 65 | 7  | 2 | 0 | 0 |
| 54 | dominant           | female | 33 | congenital        | severe-profound | no testing                | not solved | -                 | 629 | 518 | 79 | 6  | 1 | 0 | 0 |
| 55 | presumed recessive | male   | 0  | congenital        | severe-profound | DFNB1 testing             | solved     | reported mutation | 575 | 457 | 69 | 8  | 3 | 1 | 0 |
| 56 | presumed recessive | male   | 7  | childhood (<18)   | mild-moderate   | DFNB1 testing             | not solved | -                 | 831 | 495 | 83 | 24 | 3 | 1 | 0 |
| 57 | presumed recessive | female | 0  | congenital        | severe-profound | no testing                | not solved | -                 | 609 | 565 | 69 | 7  | 2 | 0 | 0 |
| 58 | sporadic           | female | 50 | adult onset (>18) | mild-moderate   | no testing                | not solved | -                 | 619 | 520 | 82 | 9  | 2 | 1 | 0 |
| 59 | sporadic           | female | 17 | congenital        | severe-profound | no testing                | solved     | novel mutation    | 608 | 501 | 74 | 10 | 6 | 0 | 0 |
| 60 | presumed recessive | female | 8  | congenital        | severe-profound | no testing                | solved     | reported mutation | 641 | 534 | 86 | 10 | 5 | 1 | 0 |
| 61 | sporadic           | male   | 2  | congenital        | mild-moderate   | DFNB1 testing             | solved     | novel mutation    | 605 | 505 | 77 | 8  | 3 | 0 | 0 |
| 62 | sporadic           | female | 9  | childhood (<18)   | asymmetric      | no testing                | not solved | -                 | 795 | 417 | 56 | 6  | 1 | 1 | 0 |
| 63 | presumed recessive | female | 0  | congenital        | severe-profound | DFNB1 testing             | not solved | -                 | 600 | 495 | 75 | 6  | 2 | 0 | 0 |
| 64 | sporadic           | female | 11 | congenital        | asymmetric      | DFNB1 and other gene test | not solved | -                 | 623 | 510 | 76 | 6  | 1 | 0 | 0 |
| 65 | dominant           | female | 74 | adult onset (>18) | mild-moderate   | no testing                | not solved | -                 | 556 | 457 | 71 | 7  | 0 | 1 | 1 |
| 66 | dominant           | female | 21 | congenital        | severe-profound | no testing                | solved     | reported mutation | 583 | 472 | 74 | 10 | 4 | 2 | 0 |
| 67 | dominant           | male   | 37 | congenital        | severe-profound | other gene test           | not solved | -                 | 879 | 471 | 62 | 4  | 0 | 0 | 0 |
| 68 | dominant           | male   | 0  | childhood (<18)   | mild-moderate   | other gene test           | not solved | -                 | 600 | 488 | 74 | 6  | 0 | 0 | 0 |
| 69 | sporadic           | female | 1  | congenital        | severe-profound | no testing                | not solved | -                 | 572 | 525 | 75 | 11 | 6 | 0 | 0 |
| 70 | presumed recessive | male   | 0  | congenital        | severe-profound | no testing                | not solved | -                 | 861 | 446 | 66 | 4  | 0 | 0 | 0 |
| 71 | presumed recessive | male   | 0  | congenital        | severe-profound | no testing                | not solved | -                 | 621 | 517 | 84 | 11 | 5 | 0 | 0 |
| 72 | presumed recessive | female | 0  | congenital        | severe-profound | no testing                | solved     | novel mutation    | 599 | 555 | 73 | 7  | 3 | 0 | 0 |
| 73 | presumed recessive | female | 0  | congenital        | mild-moderate   | no testing                | solved     | reported mutation | 599 | 495 | 75 | 6  | 3 | 1 | 0 |
| 74 | presumed recessive | female | 4  | congenital        | mild-moderate   | no testing                | not solved | -                 | 555 | 517 | 80 | 5  | 4 | 0 | 0 |
| 75 | presumed recessive | female | 9  | childhood (<18)   | mild-moderate   | no testing                | solved     | reported mutation | 580 | 526 | 80 | 9  | 4 | 0 | 0 |
| 76 | sporadic           | male   | 14 | congenital        | severe-profound | no testing                | solved     | novel mutation    | 503 | 456 | 67 | 7  | 4 | 0 | 0 |
| 77 | sporadic           | male   | 7  | childhood (<18)   | severe-profound | no testing                | not solved | -                 | 557 | 512 | 79 | 7  | 5 | 0 | 0 |
| 78 | presumed recessive | male   | 2  | congenital        | severe-profound | no testing                | solved     | reported mutation | 534 | 493 | 74 | 7  | 7 | 2 | 0 |
| 79 | presumed recessive | female | 9  | childhood (<18)   | mild-moderate   | no testing                | not solved | -                 | 559 | 509 | 64 | 2  | 1 | 0 | 0 |
| 80 | sporadic           | female | 1  | congenital        | mild-moderate   | no testing                | not solved | -                 | 571 | 524 | 71 | 3  | 2 | 0 | 0 |
| 81 | sporadic           | female | 7  | childhood (<18)   | asymmetric      | no testing                | not solved | -                 | 591 | 541 | 78 | 4  | 3 | 0 | 0 |
| 82 | dominant           | female | 22 | 0                 | severe-profound | no testing                | not solved | -                 | 567 | 524 | 71 | 3  | 2 | 0 | 1 |
| 83 | dominant           | female | 11 | childhood (<18)   | severe-profound | no testing                | not solved | -                 | 558 | 508 | 75 | 2  | 1 | 0 | 0 |
| 84 | sporadic           | female | 8  | childhood (<18)   | severe-profound | no testing                | not solved | -                 | 549 | 508 | 69 | 2  | 1 | 0 | 0 |
| 85 | dominant           | male   | 7  | congenital        | mild-moderate   | no testing                | not solved | -                 | 540 | 487 | 79 | 2  | 0 | 1 | 0 |
| 86 | dominant           | female | 13 | childhood (<18)   | mild-moderate   | no testing                | not solved | -                 | 596 | 547 | 83 | 3  | 2 | 1 | 1 |
| 87 | sporadic           | male   | 9  | congenital        | mild-moderate   | no testing                | not solved | -                 | 572 | 526 | 79 | 4  | 2 | 0 | 0 |
| 88 | sporadic           | female | 10 | childhood (<18)   | mild-moderate   | no testing                | not solved | -                 | 565 | 509 | 73 | 1  | 0 | 0 | 0 |
| 89 | sporadic           | female | 10 | childhood (<18)   | mild-moderate   | no testing                | not solved | -                 | 567 | 453 | 63 | 4  | 3 | 0 | 0 |
| 90 | sporadic           | male   | 7  | congenital        | mild-moderate   | no testing                | not solved | -                 | 645 | 516 | 79 | 7  | 1 | 1 | 1 |
| 91 | presumed recessive | male   | 0  | congenital        | severe-profound | DFNB1 testing             | not solved | -                 | 512 | 403 | 60 | 5  | 4 | 1 | 0 |
| 92 | sporadic           | -      | -  | -                 | -               | no testing                | solved     | novel mutation    | 590 | 475 | 60 | 4  | 3 | 0 | 0 |
| 93 | dominant           | male   | 47 | adult onset (>18) | mild-moderate   | no testing                | solved     | reported mutation | 603 | 481 | 71 | 1  | 1 | 1 | 0 |
| 94 | sporadic           | male   | 9  | childhood (<18)   | mild-moderate   | DFNB1 testing             | solved     | reported mutation | 585 | 510 | 70 | 9  | 7 | 3 | 0 |

|                       |        |                    |                 |            |                          |     |     |    |   |   |   |   |
|-----------------------|--------|--------------------|-----------------|------------|--------------------------|-----|-----|----|---|---|---|---|
| 95 dominant           | male   | 4 childhood (<18)  | mild-moderate   | no testing | not solved -             | 552 | 480 | 62 | 2 | 1 | 0 | 0 |
| 96 dominant           | female | 30 childhood (<18) | mild-moderate   | no testing | not solved -             | 554 | 490 | 78 | 4 | 2 | 0 | 0 |
| 97 sporadic           | male   | 2 congenital       | mild-moderate   | no testing | solved reported mutation | 507 | 433 | 67 | 7 | 5 | 0 | 1 |
| 98 presumed recessive | female | 62 congenital      | severe-profound | no testing | solved reported mutation | 522 | 449 | 64 | 5 | 4 | 1 | 0 |
| 99 dominant           | female | 13 childhood (<18) | mild-moderate   | no testing | solved reported mutation | 513 | 446 | 68 | 3 | 1 | 2 | 0 |
| 100 recessive         | female | 11 congenital      | mild-moderate   | no testing | solved reported mutation | 524 | 385 | 57 | 6 | 5 | 1 | 0 |
