# Supplementary material
Source: PubMed Central journal article supplement (PMC3887546)
Supplement: NIHMS527553-supplement-Suppl_Data_3.pdf [file NIHMS527553-supplement-Suppl_Data_3.pdf]

| Sample ID | Candidate Variants                                                                                                                                                                                                                                                              | Causative Deafness Mutations                                                                                           | Prev Reported DCMs                                                                                                                       | Other Disease Causing Mutations                         |
|-----------|---------------------------------------------------------------------------------------------------------------------------------------------------------------------------------------------------------------------------------------------------------------------------------|------------------------------------------------------------------------------------------------------------------------|------------------------------------------------------------------------------------------------------------------------------------------|---------------------------------------------------------|
| 1         | CDH23 NM_001171931:c.1096G>A NM_001171931:p.Ala366Thr;<br>CDH23 NM_001171930:c.3293A>G<br>NM_001171930:p.Asn1098Ser; USH1G NM_173477:c.1258C>G<br>NM_173477:p.Leu420Val                                                                                                         | CDH23 NM_001171931:c.1096G>A<br>NM_001171931:p.Ala366Thr; CDH23<br>NM_001171930:c.3293A>G<br>NM_001171930:p.Asn1098Ser | CDH23 NM_001171931:c.1096G>A<br>NM_001171931:p.Ala366Thr; CDH23<br>NM_001171930:c.3293A>G<br>NM_001171930:p.Asn1098Ser                   | -                                                       |
| 2         | USH2A NM_206933:c.14074G>A NM_206933:p.Gly4692Arg;<br>TMC1 NM_138691:c.624C>A NM_138691:p.Ser208Arg; CDH23<br>NM_022124:c.419G>A NM_022124:p.Arg140His                                                                                                                          | -                                                                                                                      | -                                                                                                                                        | -                                                       |
| 3         | STRC NM_153700:c.4057C>T NM_153700:p.Gln1353Stop; STRC<br>Gene Deletion                                                                                                                                                                                                         | STRC NM_153700:c.4057C>T<br>NM_153700:p.Gln1353Stop; STRC Gene Deletion                                                | STRC NM_153700:c.4057C>T<br>NM_153700:p.Gln1353Stop; STRC Gene<br>Deletion                                                               | -                                                       |
| 4         | MYO6 NM_004999:c.863_866delACAA                                                                                                                                                                                                                                                 | MYO6 NM_004999:c.863_866delACAA                                                                                        | -                                                                                                                                        | -                                                       |
| 5         | USH2A NM_007123:c.1434G>C NM_007123:p.Glu478Asp                                                                                                                                                                                                                                 | -                                                                                                                      | -                                                                                                                                        | -                                                       |
| 6         | KCNQ4 NM_172163:c.842T>C NM_172163:p.Leu281Ser                                                                                                                                                                                                                                  | KCNQ4 NM_172163:c.842T>C<br>NM_172163:p.Leu281Ser                                                                      | KCNQ4 NM_172163:c.842T>C<br>NM_172163:p.Leu281Ser                                                                                        | WFS1 NM_001145853:c.2327A>T<br>NM_001145853:p.Glu776Val |
| 7         | MYO15A NM_016239:c.3307G>T NM_016239:p.Gly1103Trp;<br>MYO15A NM_016239:c.8708G>A NM_016239:p.Arg2903Gln;<br>MYH14 NM_001077186:c.5917G>T<br>NM_001077186:p.Glu1973Stop                                                                                                          | MYH14 NM_001077186:c.5917G>T<br>NM_001077186:p.Glu1973Stop                                                             | -                                                                                                                                        | -                                                       |
| 8         | ESPN NM_031475:c.338G>A NM_031475:p.Arg113His; LOXHD1<br>NM_001145472:c.2095A>T NM_001145472:p.Ile699Phe; MYH14<br>NM_001145809:c.5020G>A NM_001145809:p.Val1674Met                                                                                                             | MYH14 NM_001145809:c.5020G>A<br>NM_001145809:p.Val1674Met                                                              | -                                                                                                                                        | -                                                       |
| 9         | GPR98 NM_032119:c.11247C>A NM_032119:p.Asp3749Glu;<br>GJB6 NM_001110219:c.212T>C NM_001110219:p.Val71Ala                                                                                                                                                                        | -                                                                                                                      | -                                                                                                                                        | -                                                       |
| 10        | WFS1 NM_001145853:c.2605_2606insAGCACCGTGCAT                                                                                                                                                                                                                                    | WFS1<br>NM_001145853:c.2605_2606insAGCACCGTGCAT                                                                        | DFNB31 NM_001173425:c.33C>G<br>NM_001173425:p.Ser11Arg                                                                                   | WFS1 NM_001145853:c.2611G>A<br>NM_001145853:p.Val871Met |
| 11        | USH1G NM_173477:c.1360C>T NM_173477:p.Pro454Ser                                                                                                                                                                                                                                 | -                                                                                                                      | -                                                                                                                                        | -                                                       |
| 12        | DFNB59 NM_001042702:c.611A>G NM_001042702:p.His204Arg;<br>MYO3A NM_017433:c.596G>A NM_017433:p.Cys199Ty                                                                                                                                                                         | -                                                                                                                      | MYO3A NM_017433:c.596G>A<br>NM_017433:p.Cys199Ty; MYO1A<br>NM_005379:c.916G>A<br>NM_005379:p.Val306Met *variant re-assigned<br>as benign | -                                                       |
| 13        | -                                                                                                                                                                                                                                                                               | -                                                                                                                      | OTOF NM_004802:c.223C>T<br>NM_004802:p.Arg822Trp *variant re-assigned<br>as benign                                                       | -                                                       |
| 14        | MYO7A NM_001127180:c.5113C>T<br>NM_001127180:p.Arg1705Trp; OTOA NM_170664:c.550G>A<br>NM_170664:p.Val184Met; TRIOBP NM_001039141:c.584C>T<br>NM_001039141:p.Thr195Ile                                                                                                           | -                                                                                                                      | -                                                                                                                                        | -                                                       |
| 15        | WFS1 NM_006005:c.2054G>C NM_006005:p.Arg685Pro                                                                                                                                                                                                                                  | WFS1 NM_006005:c.2054G>C<br>NM_006005:p.Arg685Pro                                                                      | WFS1 NM_006005:c.2054G>C<br>NM_006005:p.Arg685Pro                                                                                        | -                                                       |
| 16        | GPSM2 NM_013296:c.1216C>T NM_013296:p.Arg406Trp;<br>DIAPH1 NM_005219:c.200C>T NM_005219:p.Ala67Val; GJB2<br>NM_004004:c.389G>C NM_004004:p.Gly130Ala; GJB2<br>NM_004004:c.109G>A NM_004004:p.Val37Ile; TRIOBP<br>NM_001039141:c.638G>A NM_001039141:p.Gly213Asp;<br>chrM:827A>G | -                                                                                                                      | GJB2 NM_004004:c.389G>C<br>NM_004004:p.Gly130Ala; GJB2<br>NM_004004:c.109G>A NM_004004:p.Val37Ile;<br>chrM:827A>G *re-assigned benign    | -                                                       |

|    |                                                                                                                                                                                                                                                                                                                                                                                                                                                |                                                                                                     |                                                |                                                      |
|----|------------------------------------------------------------------------------------------------------------------------------------------------------------------------------------------------------------------------------------------------------------------------------------------------------------------------------------------------------------------------------------------------------------------------------------------------|-----------------------------------------------------------------------------------------------------|------------------------------------------------|------------------------------------------------------|
| 17 | OTOF NM_194322:c.1331G>A NM_194322:p.Arg444Gln; GPR98 NM_032119:c.8407G>A NM_032119:p.Ala2803Thr; TMC1 NM_138691:c.237_239delAGA ; MYO3A NM_017433:c.3094G>A NM_017433:p.Ala1032Thr; MYO7A NM_000260:c.905G>A NM_000260:p.Arg302His; PTPRQ NM_001145026:c.2377T>A NM_001145026:p.Tyr793Asn                                                                                                                                                     | -                                                                                                   | MYO7A NM_000260:c.905G>A NM_000260:p.Arg302His | MYO7A NM_000260:c.905G>A NM_000260:p.Arg302His       |
| 18 | USH2A NM_206933:c.15433G>A NM_206933:p.Val5145Ile; OTOF NM_194322:c.3385G>A NM_194322:p.Glu1129Lys; WFS1 NM_006005:c.136C>T NM_006005:p.Pro46Ser; SLC26A5 NM_198999:c.989A>G NM_198999:p.Asn330Ser; TECTA NM_005422:c.2266A>G NM_005422:p.Lys756Glu; TECTA NM_005422:c.2507G>A NM_005422:p.Arg836Gln; MYH14 NM_024729:c.483G>A NM_024729:p.Met161Ile; TRIOBP NM_001039141:c.3089C>G NM_001039141:p.Pro1030Arg POU3F4 NM_000307:c.917_919delAGG | TECTA NM_005422:c.2266A>G NM_005422:p.Lys756Glu; TECTA NM_005422:c.2507G>A NM_005422:p.Arg836Gln    | -                                              | -                                                    |
| 19 | USH2A NM_206933:c.14753C>T NM_206933:p.Thr4918Met; OTOF NM_194323:c.3257G>A NM_194323:p.Arg1086Gln; GJB2 NM_004004:c.35delG ; USH1G NM_173477:c.566G>A NM_173477:p.Arg189Gln; LOXHD1 NM_144612:c.4776C>A NM_144612:p.Ser1592Arg                                                                                                                                                                                                                | GJB2 NM_004004:c.35delG (homo)                                                                      | GJB2 NM_004004:c.35delG                        | -                                                    |
| 20 | PTPRQ NM_001145026:c.4664T>C NM_001145026:p.Ile1555Thr; MYO15A NM_016239:c.8269G>A NM_016239:p.Val2757Met                                                                                                                                                                                                                                                                                                                                      | -                                                                                                   | -                                              | -                                                    |
| 21 | GJB2 NM_004004:c.109G>A NM_004004:p.Val37Ile; MYO15A NM_016239:c.6728C>T NM_016239:p.Thr2243Met                                                                                                                                                                                                                                                                                                                                                | -                                                                                                   | GJB2 NM_004004:c.109G>A NM_004004:p.Val37Ile   | WFS1 NM_001145853:c.2611G>A NM_001145853:p.Val871Met |
| 22 | MYO7A NM_001127180:c.4643A>G NM_001127180:p.Asn1548Ser; MYO15A NM_016239:c.700G>T NM_016239:p.Glu234Stop; MYO15A NM_016239:c.9571C>G NM_016239:p.Arg3191Gly                                                                                                                                                                                                                                                                                    | MYO15A NM_016239:c.700G>T NM_016239:p.Glu234Stop; MYO15A NM_016239:c.9571C>G NM_016239:p.Arg3191Gly | -                                              | -                                                    |
| 23 | DIAPH1 NM_005219:c.3589G>A NM_005219:p.Gly1197Ser                                                                                                                                                                                                                                                                                                                                                                                              | DIAPH1 NM_005219:c.3589G>A NM_005219:p.Gly1197Ser                                                   | -                                              | WFS1 NM_001145853:c.1294C>G NM_001145853:p.Leu432Val |
| 24 | -                                                                                                                                                                                                                                                                                                                                                                                                                                              | -                                                                                                   | -                                              | -                                                    |
| 25 | USH2A NM_206933:c.7685T>C NM_206933:p.Val2562Ala; COL11A2 NM_080681:c.353G>C NM_080681:p.Arg118Pro; CDH23 NM_001171931:c.1307G>A NM_001171931:p.Ser436Asn; ACTG1 NM_001614:c.962C>T NM_001614:p.Ala321Val; STRC gene deletion                                                                                                                                                                                                                  | STRC gene deletion (homo)                                                                           | STRC Gene Deletion                             | WFS1 NM_001145853:c.2611G>A NM_001145853:p.Val871Met |

|    |                                                                                                                                                                                                                                                                                                                                                                                                                                                                                                                                                                                                                                                                                                                                                                                                                              |                                                                                                      |                                                                                                              |                                                  |
|----|------------------------------------------------------------------------------------------------------------------------------------------------------------------------------------------------------------------------------------------------------------------------------------------------------------------------------------------------------------------------------------------------------------------------------------------------------------------------------------------------------------------------------------------------------------------------------------------------------------------------------------------------------------------------------------------------------------------------------------------------------------------------------------------------------------------------------|------------------------------------------------------------------------------------------------------|--------------------------------------------------------------------------------------------------------------|--------------------------------------------------|
| 26 | USH2A NM_206933:c.13361T>A NM_206933:p.Val4454Asp; GPR98 NM_032119:c.3482C>G NM_032119:p.Ser1161Cys; DFN5A NM_001127453:c.1198G>A NM_001127453:p.Ala400Thr; SLC26A4 NM_000441:c.2139T>G NM_000441:p.Ile713Met; SLC26A4 NM_000441:c.2190G>T NM_000441:p.Gln730His; TJP2 NM_001170416:c.1184C>T NM_001170416:p.Thr395Met; PCDH15 NM_001142764:c.4840_4841insAACA ; USH1C NM_153676:c.2488G>A NM_153676:p.Gly830Arg; TECTA NM_005422:c.2558A>G NM_005422:p.Asn853Ser; MYO1A NM_005379:c.1517G>C NM_005379:p.Cys506Ser; OTOA NM_144672:c.2417A>C NM_144672:p.Tyr806Ser; MYO15A NM_016239:c.9754A>G NM_016239:p.Asn3252Asp; LOXHD1 NM_001145473:c.377A>G NM_001145473:p.Tyr126Cys; LOXHD1 NM_144612:c.3990_3994delATC ; LOXHD1 NM_144612:c.2030G>C NM_144612:p.Ser677Thr; TRIOBP NM_001039141:c.6556G>A NM_001039141:p.Gly2186Ser | SLC26A4 NM_000441:c.2139T>G NM_000441:p.Ile713Met; SLC26A4 NM_000441:c.2190G>T NM_000441:p.Gln730His | SLC26A4 NM_000441:c.2139T>G NM_000441:p.Ile713Met                                                            | -                                                |
| 27 | STRC gene deletion (homo)                                                                                                                                                                                                                                                                                                                                                                                                                                                                                                                                                                                                                                                                                                                                                                                                    | STRC gene deletion (homo)                                                                            | STRC Gene Deletion                                                                                           | -                                                |
| 28 | WFS1 NM_006005:c.2452C>T NM_006005:p.Arg818Cys; DSPP NM_014208:c.392T>C NM_014208:p.Ile131Thr; GPR98 NM_032119:c.5830G>A NM_032119:p.Asp1944Asn                                                                                                                                                                                                                                                                                                                                                                                                                                                                                                                                                                                                                                                                              | -                                                                                                    | -                                                                                                            | WFS1 NM_006005:c.2452C>T NM_006005:p.Arg818Cys   |
| 29 | COL11A2 NM_080681:c.1525G>A NM_080681:p.Gly509Arg; EYA4 NM_172105:c.374T>C NM_172105:p.Ile125Thr; SLC26A5 NM_198999:c.989A>G NM_198999:p.Asn330Ser; DFNB31 NM_001173425:c.1148C>A NM_001173425:p.Thr383Asn; MYO7A NM_001127180:c.494C>T NM_001127180:p.Thr165Met; MYO7A NM_000260:c.6024delG; MYO1A NM_005379:c.916G>A NM_005379:p.Val306Met                                                                                                                                                                                                                                                                                                                                                                                                                                                                                 | MYO7A NM_001127180:c.494C>T NM_001127180:p.Thr165Met; MYO7A NM_000260:c.6024delG                     | MYO7A NM_001127180:c.494C>T NM_001127180:p.Thr165Met; DFNB31 NM_001173425:c.1148C>A NM_001173425:p.Thr383Asn | -                                                |
| 30 | ILDR1 NM_175924:c.1173C>A NM_175924:p.Ser391Arg                                                                                                                                                                                                                                                                                                                                                                                                                                                                                                                                                                                                                                                                                                                                                                              | -                                                                                                    | -                                                                                                            | -                                                |
| 31 | DIAPH1 NM_005219:c.2200G>A NM_005219:p.Gly734Arg                                                                                                                                                                                                                                                                                                                                                                                                                                                                                                                                                                                                                                                                                                                                                                             | -                                                                                                    | -                                                                                                            | -                                                |
| 32 | DFNB59 NM_001042702:c.499C>T NM_001042702:p.Arg167Stop                                                                                                                                                                                                                                                                                                                                                                                                                                                                                                                                                                                                                                                                                                                                                                       | -                                                                                                    | DFNB59 NM_001042702:c.499C>T NM_001042702:p.Arg167Stop; CDH23 NM_022124:c.3293A>G NM_022124:p.Asn1098Ser     | CDH23 NM_022124:c.3293A>G NM_022124:p.Asn1098Ser |
| 33 | USH2A NM_206933:c.10769C>T NM_206933:p.Pro3590Leu; TMC1 NM_138691:c.908A>G NM_138691:p.Asp303Gly; PCDH15 NM_001142764:c.2885G>A NM_001142764:p.Arg962His; CDH23 NM_001171933:c.743G>A NM_001171933:p.Arg248His; OTOA NM_144672:c.1058T>C NM_144672:p.Met353Thr; MYH14 NM_001145809:c.2792G>A NM_001145809:p.Arg931His                                                                                                                                                                                                                                                                                                                                                                                                                                                                                                        | -                                                                                                    | -                                                                                                            | -                                                |
| 34 | GRXCR1 NM_001080476:c.272G>T NM_001080476:p.Gly91Val; GJB2 NM_004004:c.35delG ; TRIOBP NM_001039141:c.3232C>T NM_001039141:p.Arg1078Cys                                                                                                                                                                                                                                                                                                                                                                                                                                                                                                                                                                                                                                                                                      | GJB2 NM_004004:c.35delG (homo)                                                                       | -                                                                                                            | -                                                |
| 35 | USH2A NM_206933:c.11597C>T NM_206933:p.Ala3866Val; WFS1 NM_006005:c.662A>G NM_006005:p.Lys221Arg; MYO15A NM_016239:c.8269G>A NM_016239:p.Val2757Met; MYH9 NM_002473:c.4396C>T NM_002473:p.Arg1466Trp; TRIOBP NM_001039141:c.634G>A NM_001039141:p.Gly212Ser                                                                                                                                                                                                                                                                                                                                                                                                                                                                                                                                                                  | MYO15A NM_016239:c.9478C>T NM_016239:p.Leu3160Phe (homo)                                             | MYO15A NM_016239:c.9478C>T NM_016239:p.Leu3160Phe                                                            | -                                                |
| 36 | -                                                                                                                                                                                                                                                                                                                                                                                                                                                                                                                                                                                                                                                                                                                                                                                                                            | -                                                                                                    | -                                                                                                            | -                                                |

|    |                                                                                                                                                                                                                                                                      |                                                                                      |                                                                                               |                                                                                               |
|----|----------------------------------------------------------------------------------------------------------------------------------------------------------------------------------------------------------------------------------------------------------------------|--------------------------------------------------------------------------------------|-----------------------------------------------------------------------------------------------|-----------------------------------------------------------------------------------------------|
| 37 | GPSM2 NM_013296:c.741delC; USH2A NM_206933:c.10246T>G NM_206933:p.Cys3416Gly                                                                                                                                                                                         | -                                                                                    | -                                                                                             | -                                                                                             |
| 38 | OTOF NM_194323:c.1665C>G NM_194323:p.Asp555Glu; MYO3A NM_017433:c.2849G>A NM_017433:p.Arg950His; PCDH15 NM_001142763:c.3116G>A NM_001142763:p.Arg1039His                                                                                                             | -                                                                                    | -                                                                                             | -                                                                                             |
| 39 | OTOF NM_194248:c.1640C>T NM_194248:p.Thr547Met; GPR98 NM_032119:c.12185G>A NM_032119:p.Arg4062Gln; GPR98 NM_032119:c.16927_16928insA ; ESRRB NM_004452:c.1366T>C NM_004452:p.Phe456Leu                                                                               | GPR98 NM_032119:c.12185G>A NM_032119:p.Arg4062Gln; GPR98 NM_032119:c.16927_16928insA | -                                                                                             | -                                                                                             |
| 40 | GJB2 NM_004004:c.101T>C NM_004004:p.Met34Thr; COCH NM_004086:c.1115T>C NM_004086:p.Ile372Thr                                                                                                                                                                         | COCH NM_004086:c.1115T>C NM_004086:p.Ile372Thr                                       | GJB2 NM_004004:c.101T>C NM_004004:p.Met34Thr                                                  | -                                                                                             |
| 41 | GPR98 NM_032119:c.13650T>G NM_032119:p.Ile4550Met; ESRRB NM_004452:c.1366T>C NM_004452:p.Phe456Leu; STRC Gene Deletion                                                                                                                                               | STRC gene deletion (homo)                                                            | STRC Gene Deletion                                                                            | -                                                                                             |
| 42 | USH2A NM_007123:c.2276G>T NM_007123:p.Cys759Phe; GJB2 NM_004004:c.101T>C NM_004004:p.Met34Thr; MYH14 NM_024729:c.1895G>A NM_024729:p.Arg632Gln                                                                                                                       | MYH14 NM_024729:c.1895G>A NM_024729:p.Arg632Gln                                      | USH2A NM_007123:c.2276G>T NM_007123:p.Cys759Phe; GJB2 NM_004004:c.101T>C NM_004004:p.Met34Thr | USH2A NM_007123:c.2276G>T NM_007123:p.Cys759Phe; GJB2 NM_004004:c.101T>C NM_004004:p.Met34Thr |
| 43 | USH2A NM_206933:c.7718G>A NM_206933:p.Arg2573His; CDH23 NM_001171931:c.3067G>A NM_001171931:p.Asp1023Asn                                                                                                                                                             | CDH23 NM_001171931:c.3067G>A NM_001171931:p.Asp1023Asn (homo)                        | -                                                                                             | -                                                                                             |
| 44 | CCDC50 NM_174908:c.653A>G NM_174908:p.Lys218Arg; GPR98 NM_032119:c.6608T>C NM_032119:p.Val2203Ala; MYO7A NM_001127180:c.2361C>A NM_001127180:p.Tyr787Stop; MYO15A NM_016239:c.9754A>G NM_016239:p.Asn3252Asp; LOXHD1 NM_001145472:c.1690C>T NM_001145472:p.Arg564Cys | MYO7A NM_001127180:c.2361C>A NM_001127180:p.Tyr787Stop (homo)                        | -                                                                                             | -                                                                                             |
| 45 | MARVELD2 NM_001038603:c.412G>A NM_001038603:p.Gly138Arg; COL11A2 NM_080680:c.5000G>A NM_080680:p.Arg1667His; MYO6 NM_004999:c.3667G>A NM_004999:p.Asp1223Asn; PCDH15 NM_001142771:c.4591C>T NM_001142771:p.Arg1531Cys                                                | -                                                                                    | -                                                                                             | -                                                                                             |
| 46 | SLC26A4 NM_000441:c.1892C>T NM_000441:p.Thr631Ile                                                                                                                                                                                                                    | -                                                                                    | -                                                                                             | -                                                                                             |
| 47 | GJB2 NM_004004:c.439G>A NM_004004:p.Glu147Lys; ESPN NM_031475:c.1153T>C NM_031475:p.Ser385Pro; GJB3 NM_024009:c.712A>C NM_024009:p.Thr238Pro; USH2A NM_206933:c.10246T>G NM_206933:p.Cys3416Gly                                                                      | -                                                                                    | GJB2 NM_004004:c.439G>A NM_004004:p.Glu147Lys                                                 | -                                                                                             |
| 48 | CLRN1 NM_001195794:c.144T>G NM_001195794:p.Asn48Lys; PCDH15 NM_033056:c.733C>T NM_033056:p.Arg245Stop                                                                                                                                                                | -                                                                                    | CLRN1 NM_001195794:c.144T>G NM_001195794:p.Asn48Lys                                           | CLRN1 NM_001195794:c.144T>G NM_001195794:p.Asn48Lys                                           |
| 49 | WFS1 NM_001145853:c.1277G>A NM_001145853:p.Cys426Tyr; GPR98 NM_032119:c.7874G>A NM_032119:p.Arg2625His; MYO15A NM_016239:c.8795G>A NM_016239:p.Arg2932Lys                                                                                                            | -                                                                                    | -                                                                                             | WFS1 NM_001145853:c.1277G>A NM_001145853:p.Cys426Tyr                                          |
| 50 | OTOF NM_194323:c.1633A>T NM_194323:p.Thr545Ser; CDH23 NM_022124:c.5711C>T NM_022124:p.Thr1904Met                                                                                                                                                                     | -                                                                                    | -                                                                                             | -                                                                                             |

|    |                                                                                                                                                                                                                                                                                                                                          |                                                                                                               |                                                                      |                                                   |
|----|------------------------------------------------------------------------------------------------------------------------------------------------------------------------------------------------------------------------------------------------------------------------------------------------------------------------------------------|---------------------------------------------------------------------------------------------------------------|----------------------------------------------------------------------|---------------------------------------------------|
| 51 | OTOF NM_194248:c.367G>A NM_194248:p.Gly123Ser; ILDR1 NM_175924:c.227C>T NM_175924:p.Ala76Val; TJP2 NM_001170415:c.1490G>A NM_001170415:p.Arg497Lys; MYO3A NM_017433:c.509G>A NM_017433:p.Gly170Asp; MYO3A NM_017433:c.533C>T NM_017433:p.Thr178Ile; MYO15A NM_016239:c.7225delC; TRIOBP NM_001039141:c.3089C>G NM_001039141:p.Pro1030Arg | MYO15A NM_016239:c.7225delC (homo)                                                                            | USH1C NM_005709:c.388G>A NM_005709:p.Val130Ile                       | USH1C NM_005709:c.388G>A NM_005709:p.Val130Ile    |
| 52 | GPR98 NM_032119:c.14719G>T NM_032119:p.Val4907Phe                                                                                                                                                                                                                                                                                        | -                                                                                                             | -                                                                    | -                                                 |
| 53 | OTOF NM_194248:c.5558G>A NM_194248:p.Arg1853Gln; RDX NM_002906:c.707C>T NM_002906:p.Pro236Leu                                                                                                                                                                                                                                            | -                                                                                                             | -                                                                    | -                                                 |
| 54 | USH2A NM_206933:c.7685T>C NM_206933:p.Val2562Ala                                                                                                                                                                                                                                                                                         | -                                                                                                             | -                                                                    | -                                                 |
| 55 | OTOF NM_194322:c.395G>A NM_194322:p.Arg132Gln; SLC26A4 NM_000441:c.1226G>A NM_000441:p.Arg409His; LRTOMT NM_001145308:c.623G>A NM_001145308:p.Arg208Gln                                                                                                                                                                                  | SLC26A4 NM_000441:c.1226G>A NM_000441:p.Arg409His (homo)                                                      | SLC26A4 NM_000441:c.1226G>A NM_000441:p.Arg409His                    | -                                                 |
| 56 | MYO15A NM_016239:c.927C>A NM_016239:p.Tyr309Stop; TRIOBP NM_007032:c.1304T>C NM_007032:p.Leu435Pro; STRC Gene Deletion                                                                                                                                                                                                                   | -                                                                                                             | STRC Gene Deletion                                                   | -                                                 |
| 57 | GPR98 NM_032119:c.13964C>T NM_032119:p.Ser4655Leu; RDX NM_002906:c.1072A>G NM_002906:p.Thr358Ala                                                                                                                                                                                                                                         | -                                                                                                             | -                                                                    | -                                                 |
| 58 | USH2A NM_206933:c.6240G>T NM_206933:p.Lys2080Asn; GJB2 NM_004004:c.478G>A NM_004004:p.Gly160Ser                                                                                                                                                                                                                                          | -                                                                                                             | GJB2 NM_004004:c.478G>A NM_004004:p.Gly160Ser                        | -                                                 |
| 59 | CDH23 NM_022124:c.4391C>T NM_022124:p.Ala1464Val; CDH23 NM_001171933:c.2171T>C NM_001171933:p.Ile724Thr; MYO7A NM_000260:c.4500_4501delTG; MYO15A NM_016239:c.823G>C NM_016239:p.Gly275Arg; LOXHD1 NM_144612:c.4526G>A NM_144612:p.Gly1509Glu; MYH9 NM_002473:c.136C>T NM_002473:p.Leu46Phe                                              | CDH23 NM_022124:c.4391C>T NM_022124:p.Ala1464Val; CDH23 NM_001171933:c.2171T>C NM_001171933:p.Ile724Thr       | -                                                                    | -                                                 |
| 60 | GPR98 NM_032119:c.16841C>T NM_032119:p.Thr5614Ile; MYO6 NM_004999:c.1120T>C NM_004999:p.Tyr374His; SLC26A5 NM_198999:c.1939A>G NM_198999:p.Thr647Ala; GJB2 NM_004004:c.439G>A NM_004004:p.Glu147Lys; MYO15A NM_016239:c.8339C>T NM_016239:p.Thr2780Met                                                                                   | GJB2 NM_004004:c.439G>A NM_004004:p.Glu147Lys (homo)                                                          | GJB2 NM_004004:c.439G>A NM_004004:p.Glu147Lys                        | -                                                 |
| 61 | MYO6 NM_004999:c.475G>A NM_004999:p.Glu159Lys; MYO7A NM_001127180:c.2558G>A NM_001127180:p.Arg853His; MYO7A NM_001127180:c.5752G>A NM_001127180:p.Val1918Ile                                                                                                                                                                             | MYO7A NM_001127180:c.2558G>A NM_001127180:p.Arg853His; MYO7A NM_001127180:c.5752G>A NM_001127180:p.Val1918Ile | -                                                                    | -                                                 |
| 62 | GJB2 NM_004004:c.35delG                                                                                                                                                                                                                                                                                                                  | -                                                                                                             | GJB2 NM_004004:c.35delG                                              | -                                                 |
| 63 | CCDC50 NM_174908:c.653A>G NM_174908:p.Lys218Arg; LOXHD1 NM_001145473:c.127G>A NM_001145473:p.Glu43Lys                                                                                                                                                                                                                                    | -                                                                                                             | -                                                                    | -                                                 |
| 64 | CDH23 NM_001171932:c.307G>A NM_001171932:p.Val103Met                                                                                                                                                                                                                                                                                     | -                                                                                                             | -                                                                    | -                                                 |
| 65 | -                                                                                                                                                                                                                                                                                                                                        | -                                                                                                             | SLC26A4 NM_000441:c.2326C>T NM_000441:p.Arg776Cys                    | SLC26A4 NM_000441:c.2326C>T NM_000441:p.Arg776Cys |
| 66 | GPR98 NM_032119:c.10271C>G NM_032119:p.Ser3424Cys; MYO1A NM_005379:c.3091A>G NM_005379:p.Lys1031Glu; GJB2 NM_004004:c.44A>C NM_004004:p.Lys15Thr; GJB2 NM_004004:c.35delG                                                                                                                                                                | GJB2 NM_004004:c.44A>C NM_004004:p.Lys15Thr; GJB2 NM_004004:c.35delG                                          | GJB2 NM_004004:c.44A>C NM_004004:p.Lys15Thr; GJB2 NM_004004:c.35delG | -                                                 |
| 67 | -                                                                                                                                                                                                                                                                                                                                        | -                                                                                                             | -                                                                    | -                                                 |
| 68 | -                                                                                                                                                                                                                                                                                                                                        | -                                                                                                             | -                                                                    | -                                                 |

|    |                                                                                                                                                                                                                                                                                                                  |                                                      |                                                                                                      |   |
|----|------------------------------------------------------------------------------------------------------------------------------------------------------------------------------------------------------------------------------------------------------------------------------------------------------------------|------------------------------------------------------|------------------------------------------------------------------------------------------------------|---|
| 69 | USH2A NM_206933:c.8146G>A NM_206933:p.Glu2716Lys; TPRN NM_173691:c.1912C>T NM_173691:p.Arg638Cys; CDH23 NM_022124:c.4892C>T NM_022124:p.Ala1631Val; CDH23 NM_022124:c.5026G>A NM_022124:p.Ala1676Thr; TECTA NM_005422:c.6458C>T NM_005422:p.Thr2153Met; MYO15A NM_016239:c.8269G>A NM_016239:p.Val2757Met        | -                                                    | -                                                                                                    | - |
| 70 | -                                                                                                                                                                                                                                                                                                                | -                                                    | -                                                                                                    | - |
| 71 | USH2A NM_206933:c.1663C>G NM_206933:p.Leu555Val; CCD50 NM_178335:c.1181A>G NM_178335:p.Lys394Arg; GPR98 NM_032119:c.15914A>G NM_032119:p.Asp5305Gly; COL11A2 NM_080681:c.434C>G NM_080681:p.Ala145Gly; MYH14 NM_001145809:c.4255C>T NM_001145809:p.Arg1419Trp                                                    | -                                                    | -                                                                                                    | - |
| 72 | SLC26A4 NM_000441:c.1341delG ; MYO15A NM_016239:c.6403G>T NM_016239:p.Val2135Leu; MYH9 NM_002473:c.5107C>T NM_002473:p.Arg1703Trp                                                                                                                                                                                | SLC26A4 NM_000441:c.1341delG (homo)                  | -                                                                                                    | - |
| 73 | CDH23 NM_022124:c.5660C>T NM_022124:p.Thr1887Ile; TECTA NM_005422:c.2725C>T NM_005422:p.Arg909Cys; OTOA Gene Deletion                                                                                                                                                                                            | OTOA gene deletion (homo)                            | SLC26A4 NM_000441:c.1790T>C NM_000441:p.Leu597Ser *variant re-assigned as benign; OTOA gene deletion | - |
| 74 | WFS1 NM_006005:c.1052A>G NM_006005:p.Tyr351Cys; LOXHD1 NM_144612:c.712G>A NM_144612:p.Val238Ile; MYH9 NM_002473:c.7C>G NM_002473:p.Gln3Glu; TRIOBP NM_001039141:c.3361C>T NM_001039141:p.Arg1121Trp                                                                                                              | -                                                    | -                                                                                                    | - |
| 75 | DFNA5 NM_001127453:c.611A>T NM_001127453:p.Asp204Val; MYO3A NM_017433:c.3215C>G NM_017433:p.Ser1072Stop; CDH23 NM_001171933:c.149C>T NM_001171933:p.Thr50Met; chrM:961delT                                                                                                                                       | chrM:961delT                                         | chrM:961delT                                                                                         | - |
| 76 | USH2A NM_206933:c.6730G>A NM_206933:p.Val2244Met; COL11A2 NM_080681:c.1928G>A NM_080681:p.Arg643Gln; USH1G NM_173477:c.251T>C NM_173477:p.Leu84Pro; TRIOBP NM_001039141:c.1283C>G NM_001039141:p.Pro428Arg                                                                                                       | USH1G NM_173477:c.251T>C NM_173477:p.Leu84Pro (homo) | -                                                                                                    | - |
| 77 | USH2A NM_206933:c.7156G>T NM_206933:p.Val2386Phe; CDH23 NM_001171933:c.2878G>A NM_001171933:p.Glu960Lys; LOXHD1 NM_144612:c.1730T>G NM_144612:p.Leu577Arg; MYH9 NM_002473:c.305A>G NM_002473:p.Lys102Arg; TRIOBP NM_007032:c.739C>T NM_007032:p.Arg247Cys                                                        | -                                                    | -                                                                                                    | - |
| 78 | USH2A NM_206933:c.5443A>G NM_206933:p.Ser1815Gly; GPR98 NM_032119:c.3151G>T NM_032119:p.Asp1051Tyr; GPR98 NM_032119:c.3191A>C NM_032119:p.Glu1064Ala; CDH23 NM_001171933:c.3055C>T NM_001171933:p.His1019Tyr; GJB2 NM_004004:c.35delG ; GJB2 NM_004004:c.35insG ;MYH14 NM_024729:c.1126G>T NM_024729:p.Gly376Cys | GJB2 NM_004004:c.35delG; GJB2 NM_004004:c.35insG     | GJB2 NM_004004:c.35delG; GJB2 NM_004004:c.35insG                                                     | - |
| 79 | OTOF NM_194323:c.133C>T NM_194323:p.Arg45Trp                                                                                                                                                                                                                                                                     | -                                                    | -                                                                                                    | - |
| 80 | SLC26A4 NM_000441:c.1790T>C NM_000441:p.Leu597Ser; CDH23 NM_022124:c.2239C>T NM_022124:p.Arg747Cys                                                                                                                                                                                                               | -                                                    | SLC26A4 NM_000441:c.1790T>C NM_000441:p.Leu597Ser *re-assigned benign                                | - |

|    |                                                                                                                                                                                                                                                                                                                                                              |                                                                                                      |                                                                                                                                                  |                                                       |
|----|--------------------------------------------------------------------------------------------------------------------------------------------------------------------------------------------------------------------------------------------------------------------------------------------------------------------------------------------------------------|------------------------------------------------------------------------------------------------------|--------------------------------------------------------------------------------------------------------------------------------------------------|-------------------------------------------------------|
| 81 | SLC26A4 NM_000441:c.2219G>T NM_000441:p.Gly740Val; TPRN NM_001128228:c.940G>A NM_001128228:p.Asp314Asn; CDH23 NM_001171931:c.1096G>A NM_001171931:p.Ala366Thr                                                                                                                                                                                                | -                                                                                                    | SLC26A4 NM_000441:c.2219G>T NM_000441:p.Gly740Val *re-assigned benign; CDH23 NM_001171931:c.1096G>A NM_001171931:p.Ala366Thr *re-assigned benign | -                                                     |
| 82 | DIAPH1 NM_005219:c.1769G>T NM_005219:p.Gly590Val; COL11A2 NM_080679:c.3814C>T NM_080679:p.Arg1272Stop                                                                                                                                                                                                                                                        | -                                                                                                    | -                                                                                                                                                | COL11A2 NM_080679:c.3814C>T NM_080679:p.Arg1272Stop   |
| 83 | PTPRQ NM_001145026:c.6890C>A NM_001145026:p.Thr2297Asn                                                                                                                                                                                                                                                                                                       | -                                                                                                    | -                                                                                                                                                | -                                                     |
| 84 | GPR98 NM_032119:c.15169C>T NM_032119:p.Pro5057Ser                                                                                                                                                                                                                                                                                                            | -                                                                                                    | -                                                                                                                                                | -                                                     |
| 85 | -                                                                                                                                                                                                                                                                                                                                                            | -                                                                                                    | GJB2 NM_004004:c.457G>A NM_004004:p.Val153Ile                                                                                                    | -                                                     |
| 86 | CCDC50 NM_178335:c.1181A>G NM_178335:p.Lys394Arg; MYO7A NM_001127180:c.1007G>A NM_001127180:p.Arg336His                                                                                                                                                                                                                                                      | -                                                                                                    | MYO7A NM_001127180:c.1007G>A NM_001127180:p.Arg336His                                                                                            | MYO7A NM_001127180:c.1007G>A NM_001127180:p.Arg336His |
| 87 | CDH23 NM_022124:c.4829G>T NM_022124:p.Gly1610Val; GJB6 NM_001110219:c.212T>C NM_001110219:p.Val71Ala                                                                                                                                                                                                                                                         | -                                                                                                    | -                                                                                                                                                | -                                                     |
| 88 | -                                                                                                                                                                                                                                                                                                                                                            | -                                                                                                    | -                                                                                                                                                | -                                                     |
| 89 | GPR98 NM_032119:c.8572A>G NM_032119:p.Ile2858Val; GPR98 NM_032119:c.17017A>G NM_032119:p.Lys5673Glu; CDH23 NM_022124:c.4858G>A NM_022124:p.Val1620Met                                                                                                                                                                                                        | -                                                                                                    | -                                                                                                                                                | -                                                     |
| 90 | MYO7A NM_001127179:c.1007G>A NM_001127179:p.Arg336His                                                                                                                                                                                                                                                                                                        | -                                                                                                    | MYO7A NM_001127179:c.1007G>A NM_001127179:p.Arg336His                                                                                            | MYO7A NM_001127179:c.1007G>A NM_001127179:p.Arg336His |
| 91 | USH1C NM_005709:c.238_239insC ; GJB2 NM_004004:c.109G>A NM_004004:p.Val37Ile; GIPC3 NM_133261:c.626G>A NM_133261:p.Cys209Tyr; TRIOBP NM_001039141:c.965C>T NM_001039141:p.Ala322Val                                                                                                                                                                          | USH1C NM_005709:c.238_239insC (homo)                                                                 | GJB2 NM_004004:c.109G>A NM_004004:p.Val37Ile                                                                                                     | -                                                     |
| 92 | USH2A NM_206933:c.6325G>A NM_206933:p.Gly2109Ser; GPR98 NM_032119:c.14965C>T NM_032119:p.Gln4989Stop; TMC1 NM_138691:c.1912G>A NM_138691:p.Gly638Ser                                                                                                                                                                                                         | USH2A NM_206933:c.6325G>A NM_206933:p.Gly2109Ser; GPR98 NM_032119:c.14965C>T NM_032119:p.Gln4989Stop | -                                                                                                                                                | -                                                     |
| 93 | ACTG1 NM_001614:c.353A>T NM_001614:p.Lys118Met                                                                                                                                                                                                                                                                                                               | ACTG1 NM_001614:c.353A>T NM_001614:p.Lys118Met                                                       | ACTG1 NM_001614:c.353A>T NM_001614:p.Lys118Met                                                                                                   | -                                                     |
| 94 | USH2A NM_206933:c.9262G>A NM_206933:p.Glu3088Lys; COL11A2 NM_080680:c.949G>C NM_080680:p.Asp317His; CDH23 NM_001171933:c.2338C>T NM_001171933:p.Arg780Cys; TECTA NM_005422:c.6062G>A NM_005422:p.Arg2021His; GJB2 NM_004004:c.427C>T NM_004004:p.Arg143Trp; LOXHD1 NM_144612:c.2036C>T NM_144612:p.Ala679Val; TRIOBP NM_007032:c.187G>A NM_007032:p.Asp63Asn | TECTA NM_005422:c.6062G>A NM_005422:p.Arg2021His                                                     | GJB2 NM_004004:c.79G>A p.Val27Ile, GJB2 NM_004004:c.427C>T p.Arg143Trp                                                                           | -                                                     |
| 95 | LOXHD1 NM_144612:c.5023C>T NM_144612:p.Arg1675Cys                                                                                                                                                                                                                                                                                                            | -                                                                                                    | -                                                                                                                                                | -                                                     |
| 96 | HGF NM_001010931:c.7G>C NM_001010931:p.Val3Leu; MYO1A NM_005379:c.659G>A NM_005379:p.Arg220Gln                                                                                                                                                                                                                                                               | -                                                                                                    | -                                                                                                                                                | -                                                     |
| 97 | GPR98 NM_032119:c.1793T>C NM_032119:p.Ile598Thr; GPR98 NM_032119:c.11974G>A NM_032119:p.Asp3992Asn; GPR98 NM_032119:c.17706G>T NM_032119:p.Leu5902Phe; PCDH15 NM_001142767:c.623G>A NM_001142767:p.Arg208Gln; MYH9 NM_002473:c.3340T>C NM_002473:p.Ser1114Pro                                                                                                | MYH9 NM_002473:c.3340T>C NM_002473:p.Ser1114Pro                                                      | -                                                                                                                                                | -                                                     |

|     |                                                                                                                                                                                                                                                               |                                |                                                                                                     |   |
|-----|---------------------------------------------------------------------------------------------------------------------------------------------------------------------------------------------------------------------------------------------------------------|--------------------------------|-----------------------------------------------------------------------------------------------------|---|
| 98  | DFNB31 NM_001173425:c.335A>T NM_001173425:p.Glu112Val;<br>MYO7A NM_001127180:c.2755G>A<br>NM_001127180:p.Ala919Thr; GJB2 NM_004004:c.35delG ;<br>TRIOBP NM_001039141:c.1613_1615delCCT                                                                        | GJB2 NM_004004:c.35delG (homo) | GJB2 NM_004004:c.35delG                                                                             | - |
| 99  | EYA4 NM_004100:c.1759C>T NM_004100:p.Arg587Stop                                                                                                                                                                                                               | -                              | EYA4 NM_004100:c.1759C>T<br>NM_004100:p.Arg587Stop; GJB2<br>NM_004004:c.101T>C NM_004004:p.Met34Thr | - |
| 100 | COL11A2 NM_080681:c.4907C>T NM_080681:p.Pro1636Leu;<br>RDX NM_002906:c.1487C>T NM_002906:p.Ala496Val; TRIOBP<br>NM_001039141:c.2204G>C NM_001039141:p.Arg735Pro;<br>TRIOBP NM_001039141:c.2216_2217delTC ; TRIOBP<br>NM_001039141:c.2220delG ; MT-RNR1 A1555G | MT-RNR1 A1555G                 | MT-RNR1 A1555G                                                                                      | - |
